# Supplementary material for: Behavioral syndromes as evolutionary constraints
Source: Oxford University Press journal article supplement (doi:10.1093/beheco/art002), 2013-01-01
Supplement: art002-TableS1.xlsx [file art002-TableS1.xlsx]

## Sheet: G matrices and a-bar ests.
ID	Study	First.Author	Genera	species	Taxa	type of matrix	# of behaviors	# of corrs/covs	Population	Behaviors	Correlations or Covariances *see_comment*	autonomy	adjusted autonomy	null autonomy	Reference
1	A	Strandberg	Canus	familiaris	Mammal	Corr	4	6	NA	playfullness,chase,curiosity,aggression	1,.74,.57,.29,1,.54,.4,1,.31,1	0.670635	0.670946	0.999536	Strandberg, E., J. Jacobsson, and P. Saetre. 2005. Direct genetic, maternal and litter effects on behaviour in German shepherd dogs in Sweden. Livest. Prod. Sci. 93:33-42.
2	B	Stirling	Daphnia	spp	Invt	Corr	4	6	NA	ns,nh,ps,ph	1,.47,.4,.43,1,.53,.75,1,.39,1	0.668	0.680408	0.981764	Stirling, G., and D. A. Roff. 2000. Behaviour plasticity without learning: phenotypic and genetic variation of naive Daphnia in an ecological trade-off. Anim. Behav. 59:929-941.
3	B	Stirling	Daphnia	spp	Invt	Corr	4	6	NA	ns,nh,ps,ph	1,.53,.43,.23,1,.07,.61,1,.48,1	0.514	0.523547	0.981764	Stirling, G., and D. A. Roff. 2000. Behaviour plasticity without learning: phenotypic and genetic variation of naive Daphnia in an ecological trade-off. Anim. Behav. 59:929-941.
4	C	House	Nicrophorus	vespilloides	Invt	Corr	3	3	males	freq,dur,speed	1,-.21,-.67,1,-.13,1	0.691224	0.693372	0.996901	House, C. M., G. M. V. Evans, P. T. Smiseth, C. E. Stamper, C. A. Walling, and A. J. Moore. 2008. The evolution of repeated mating in the burying beetle, Nicrophorus Vespilloides. Evolution 62:2004-2014.
5	D	Takahashi	Mus	musculus	Mammal	Corr	6	15	NA	too many to list	too large to list	0.354287	0.357619	0.990682	Takahashi, A., K. Tomihara, T. Shiroishi, and T. Koide. 2010. Genetic Mapping of Social Interaction Behavior in B6/MSM Consomic Mouse Strains. Behav. Genet. 40:366-376.
6	E	Quinn	Parus	major	Aves	Corr	2	1	NA	exploration behavs	1,.91,1	0.272545	0.272718	0.999367	Quinn, J. L., S. C. Patrick, S. Bouwhuis, T. A. Wilkin, and B. C. Sheldon. 2009. Heterogeneous selection on a heritable temperament trait in a variable environment. J. Anim. Ecol. 78:1203-1215.
7	F	Duckworth	Tachycinetas	bicolor	Aves	Corr	2	1	NA	aggression, dispersal	1,.55,1	0.818953	0.82105	0.997446	Duckworth, R. A., and L. E. B. Kruuk. 2009. Evolution of genetic integration between dispersal and colonization ability in a bird. Evolution 63:968-977.
8	G	Reale	Ovis	canadensis	Mammal	Corr	2	1	NA	boldness,docility	1,-.38,1	0.921834	0.924138	0.997507	Réale, D., J. Martin, D. W. Coltman, J. Poissant, and M. Festa-Bianchet. 2009. Male personality, life-history strategies and reproductive success in a promiscuous mammal. J. Evol. Biol. 22:1599-1607.
9	H	Reale	Grylus	firmus	Invt	Corr	2	1	NA	depth, distribution	1,-.32,1	0.94591	0.949212	0.996521	Réale, D., and D. A. Roff. 2002. Quantitative genetics of oviposition behaviour and interactions among oviposition traits in the sand cricket. Anim. Behav. 64:397-406.
10	I	Gromko	Drosophila	melanogaster	Invt	Corr	2	1	NA	vigor,copdur	1,-.81,1	0.493726	0.494727	0.997977	Gromko, M. H. 1987. Genetic constraint on the evolution of courtship behavior in Drosophila melanogaster. Heredity 58:435-441.
11	J	Brodie	Thamnophis	ordinoides	Reptile	Corr	2	1	ten	reversals,distance	1,.195,1	0.980612	0.985937	0.994599	Brodie, E. D. 1993. Homogeneity of the genetic variance-covariance matrix for antipredator traits in 2 natural populations of the garter snake Thamnophis ordinoides. Evolution 47:844-854.
12	J	Brodie	Thamnophis	ordinoides	Reptile	Corr	2	1	ccq	reversals,distance	1,.107,1	0.994242	1.00413	0.990149	Brodie, E. D. 1993. Homogeneity of the genetic variance-covariance matrix for antipredator traits in 2 natural populations of the garter snake Thamnophis ordinoides. Evolution 47:844-854.
13	K	van Oers	Parus	major	Aves	Corr	2	1	NA	rtb,eeb	1,.84,1	0.43	0.434154	0.990432	van Oers, K., de Jong, G., Drent, P. J. & van Noordwijk, A. J. (2004) A genetic analysis of avian personality traits: Correlated, response to artificial selection. Behavior Genetics, 34, 611-619.
14	K	van Oers	Parus	major	Aves	Corr	2	1	NA	rtb, bold	1,.94,1	0.19	0.191835	0.990432	van Oers, K., de Jong, G., Drent, P. J. & van Noordwijk, A. J. (2004) A genetic analysis of avian personality traits: Correlated, response to artificial selection. Behavior Genetics, 34, 611-619.
15	L	Dingemanse	Gasterosteus	aculeatus	Fish	Corr	3	3	s0	e2,s1,I	0.30046129, -0.09682516 ,0.06360071, 0.16112683 ,-0.06599381, 0.29800760	0.836623	0.884139	0.946257	Dingemanse et al. in prep. Genetic covariance structure in sticklebacks
16	L	Dingemanse	Gasterosteus	aculeatus	Fish	Corr	3	3	s1	e2,s1,I	0.425696274, -0.005495914, 0.0677573, 0.231432814 ,-0.0835159 ,0.2173434	0.864301	0.916977	0.942555	Dingemanse et al. in prep. Genetic covariance structure in sticklebacks
17	L	Dingemanse	Gasterosteus	aculeatus	Fish	Corr	3	3	s2	e2,s1,I	0.2774658106, -0.03037368, -0.0001691573, 0.37877764, -0.0927169717, 0.4321193554	0.957569	0.983757	0.973379	Dingemanse et al. in prep. Genetic covariance structure in sticklebacks
18	L	Dingemanse	Gasterosteus	aculeatus	Fish	Corr	3	3	s3	e2,s1,I	0.20982762, -0.1393003, 0.06594104, 0.5264197, -0.13281500, 0.30020367	0.81757	0.893286	0.915239	Dingemanse et al. in prep. Genetic covariance structure in sticklebacks
19	M	Bell	Gasterosteus	aculeatus	Fish	Corr	3	3	A (Navarro)	Activity,Aggression,Boldness	1,0.699,0.753,1,0.837	0.454927	0.484316	0.939319	Bell, A. M. 2005. Behavioural differences between individuals and two populations of stickleback (Gasterosteus aculeatus). Journal of Evolutionary Biology 18:464-473.
20	M	Bell	Gasterosteus	aculeatus	Fish	Corr	3	3	B (Putah)	Activity,Aggression,Boldness	1,0.849,0.65,1,0.26	0.230327	0.240779	0.956593	Bell, A. M. 2005. Behavioural differences between individuals and two populations of stickleback (Gasterosteus aculeatus). Journal of Evolutionary Biology 18:464-473.
21	N	Dingemanse	Gasterosteus	aculeatus	Fish	Cov	3	3	Pop Llyn Alaw	Exploration.t0, exploraiton.t1, exploration.t2	0.15,0.12,0.05,0.23, 0.23,0.32	0.193854	0.194146	0.998495	Dingemanse, N. J., I. Barber, J. Wright and J. E. Brommer. 2011. Quantitative genetics of behavioural reaction norms: genetic correlations between personality and behavioural plasticity vary across stickleback populations. J. Evol. Biol., 2012.
22	N	Dingemanse	Gasterosteus	aculeatus	Fish	Cov	2	1	Pop Cae Mawr	Exploration.elevation,Exploration.slope(time)	0.06505,-.036,0.04899	0.728687	0.729535	0.998837	Dingemanse, N. J., I. Barber, J. Wright and J. E. Brommer. 2011. Quantitative genetics of behavioural reaction norms: genetic correlations between personality and behavioural plasticity vary across stickleback populations. J. Evol. Biol., 2012.
23	N	Dingemanse	Gasterosteus	aculeatus	Fish	Cov	2	1	Pop Llyn Alaw	Exploration.elevation,Exploration.slope(time)	0.152,.0535,0.0985	0.869997	0.871309	0.998495	Dingemanse, N. J., I. Barber, J. Wright and J. E. Brommer. 2011. Quantitative genetics of behavioural reaction norms: genetic correlations between personality and behavioural plasticity vary across stickleback populations. J. Evol. Biol., 2012.
24	N	Dingemanse	Gasterosteus	aculeatus	Fish	Corr	2	1	Pop Cae Mawr	Exploration.experience.with.predator,exploration.no.experience.with predator	1,0.65,1	0.725269	0.726113	0.998837	Dingemanse, N. J., F. van der Plas, J. Wright, D. Réale, M. Schrama, D. A. Roff, E. van der Zee, and I. Barber. 2009. Individual experience and evolutionary history of predation affect expression of heritable variation in fish personality and morphology. Proceedings of the Royal Society of London Series B 276:1285-1293.
25	N	Dingemanse	Gasterosteus	aculeatus	Fish	Corr	2	1	Pop Cae Mawr	Boldness.experience.with.predator,boldness.no.experience.with predator	1,0.87,1	0.369919	0.37035	0.998837	Dingemanse, N. J., F. van der Plas, J. Wright, D. Réale, M. Schrama, D. A. Roff, E. van der Zee, and I. Barber. 2009. Individual experience and evolutionary history of predation affect expression of heritable variation in fish personality and morphology. Proceedings of the Royal Society of London Series B 276:1285-1293.
26	N	Dingemanse	Gasterosteus	aculeatus	Fish	Corr	2	1	Pop Llyn Alaw	Exploration.experience.with.predator,exploration.no.experience.with predator	1,0.84,1	0.434908	0.435563	0.998495	Dingemanse, N. J., F. van der Plas, J. Wright, D. Réale, M. Schrama, D. A. Roff, E. van der Zee, and I. Barber. 2009. Individual experience and evolutionary history of predation affect expression of heritable variation in fish personality and morphology. Proceedings of the Royal Society of London Series B 276:1285-1293.
27	N	Dingemanse	Gasterosteus	aculeatus	Fish	Corr	2	1	Pop Llyn Alaw	Activity2.experience.with.predator,Activity2.no.experience.with predator	1,0.78,1	0.546963	0.547787	0.998495	Dingemanse, N. J., F. van der Plas, J. Wright, D. Réale, M. Schrama, D. A. Roff, E. van der Zee, and I. Barber. 2009. Individual experience and evolutionary history of predation affect expression of heritable variation in fish personality and morphology. Proceedings of the Royal Society of London Series B 276:1285-1293.
28	N	Dingemanse	Gasterosteus	aculeatus	Fish	Corr	2	1	Pop Llyn Alaw	Sociability.experience.with.predator,sociability.no.experience.with predator	1,0.74.1	0.610182	0.611102	0.998495	Dingemanse, N. J., F. van der Plas, J. Wright, D. Réale, M. Schrama, D. A. Roff, E. van der Zee, and I. Barber. 2009. Individual experience and evolutionary history of predation affect expression of heritable variation in fish personality and morphology. Proceedings of the Royal Society of London Series B 276:1285-1293.
29	N	Dingemanse	Gasterosteus	aculeatus	Fish	Corr	2	1	Pop Llyn Alaw	Conspecific-exploration.experience.with.predator,conspecific-exploration.no.experience.with predator	1,0.83,1	0.455169	0.455855	0.998495	Dingemanse, N. J., F. van der Plas, J. Wright, D. Réale, M. Schrama, D. A. Roff, E. van der Zee, and I. Barber. 2009. Individual experience and evolutionary history of predation affect expression of heritable variation in fish personality and morphology. Proceedings of the Royal Society of London Series B 276:1285-1293.
30	O	Dingemanse	Gasterosteus	aculeatus	Fish	Corr	2	1	Pop Cae Mawr	explore	1,.65,1	0.725269	0.726113	0.998837	Dingemanse, N. J., F. Van der Plas, J. Wright, D. Reale, M. Schrama, D. A. Roff, E. Van der Zee, and I. Barber. 2009. Individual experience and evolutionary history of predation affect expression of heritable variation in fish personality and morphology. Proceedings of the Royal Society B-Biological Sciences 276:1285-1293.
31	O	Dingemanse	Gasterosteus	aculeatus	Fish	Corr	2	1	Pop Cae Mawr	boldness	1,.87,1	0.369919	0.37035	0.998837	Dingemanse, N. J., F. Van der Plas, J. Wright, D. Reale, M. Schrama, D. A. Roff, E. Van der Zee, and I. Barber. 2009. Individual experience and evolutionary history of predation affect expression of heritable variation in fish personality and morphology. Proceedings of the Royal Society B-Biological Sciences 276:1285-1293.
32	O	Dingemanse	Gasterosteus	aculeatus	Fish	Corr	2	1	Pop Llyn Alaw	explore	1,.84,1	0.434908	0.435563	0.998495	Dingemanse, N. J., F. Van der Plas, J. Wright, D. Reale, M. Schrama, D. A. Roff, E. Van der Zee, and I. Barber. 2009. Individual experience and evolutionary history of predation affect expression of heritable variation in fish personality and morphology. Proceedings of the Royal Society B-Biological Sciences 276:1285-1293.
33	O	Dingemanse	Gasterosteus	aculeatus	Fish	Corr	2	1	Pop Llyn Alaw	act 2	1,.78,1	0.546963	0.547787	0.998495	Dingemanse, N. J., F. Van der Plas, J. Wright, D. Reale, M. Schrama, D. A. Roff, E. Van der Zee, and I. Barber. 2009. Individual experience and evolutionary history of predation affect expression of heritable variation in fish personality and morphology. Proceedings of the Royal Society B-Biological Sciences 276:1285-1293.
34	O	Dingemanse	Gasterosteus	aculeatus	Fish	Corr	2	1	Pop Llyn Alaw	sociabiliity	1,.74,1	0.610182	0.611102	0.998495	Dingemanse, N. J., F. Van der Plas, J. Wright, D. Reale, M. Schrama, D. A. Roff, E. Van der Zee, and I. Barber. 2009. Individual experience and evolutionary history of predation affect expression of heritable variation in fish personality and morphology. Proceedings of the Royal Society B-Biological Sciences 276:1285-1293.
35	O	Dingemanse	Gasterosteus	aculeatus	Fish	Corr	2	1	Pop Llyn Alaw	explor.conspecific	1,.83,1	0.455169	0.455855	0.998495	Dingemanse, N. J., F. Van der Plas, J. Wright, D. Reale, M. Schrama, D. A. Roff, E. Van der Zee, and I. Barber. 2009. Individual experience and evolutionary history of predation affect expression of heritable variation in fish personality and morphology. Proceedings of the Royal Society B-Biological Sciences 276:1285-1293.
